# Supplementary material for: 12-month prevalence of atopic dermatitis in resource-rich countries: a systematic review and meta-analysis
Source: PubMed Central journal article supplement (PMC9448775; doi:10.1038/s41598-022-19508-7), 2022-09-06

## Supplementary Information

*Scientific Reports*

### **12-month prevalence of atopic dermatitis in resource-rich countries. A systematic review and meta-analysis**

Annika Volke,<sup>1,2\*</sup> Karolin Toompere,<sup>3</sup> Kaja-Triin Laisaar,<sup>3</sup> Marje Oona,<sup>3</sup> Anna Tisler,<sup>3</sup> Annika Johannson,<sup>3,4</sup> Kadi Kallavus,<sup>3</sup> Katrin Lang,<sup>3</sup> Ele Kiisk,<sup>3</sup> Anneli Uusküla<sup>2,3</sup>

<sup>1</sup>Department of Dermatology, Institute of Clinical Medicine, University of Tartu, Tartu, Estonia

<sup>2</sup>Dermatology Clinic, Tartu University Hospital, Tartu, Estonia

<sup>3</sup>Institute of Family Medicine and Public Health, University of Tartu, Tartu, Estonia

<sup>4</sup>Diagnostic Service, Pärnu Hospital, Pärnu, Estonia

#### **\*Corresponding author: Annika Volke**

Department of Dermatology, University of Tartu, Raja 31, Tartu 50417, Estonia

E-mail: [annika.volke@ut.ee](mailto:annika.volke@ut.ee)

Phone: +372 7319702

## Contents

**Supplementary material 1.** List of countries.

**Supplementary table 1.** Full electronic search strategy for OVID Medline.

**Supplementary table 2.** Assessments of risk of bias items by study.

**Supplementary table 3.** Sensitivity analysis of age-group definitions used in the AD prevalence.

**Supplementary figure 1.** Funnel plots for 12-month prevalence of AD across age groups.

**Supplementary material 1.** List of countries.

Australia, Austria, Belgium, Bulgaria, Canada, Chile, Croatia, (Republic of) Cyprus, Czech Republic, Denmark, Estonia, Finland, France, Germany, Greece, Hungary, Iceland, (Republic of) Ireland, Israel, Italy, Japan, South Korea, Latvia, Liechtenstein, Lithuania, Luxembourg, Malta, Netherlands, New Zealand, Norway, Poland, Portugal, Romania, Slovakia/Slovak Republic, Slovenia, Spain, Sweden, Switzerland, United Kingdom (of Great Britain and Northern Ireland), USA

**Supplementary table 1.** Full electronic search strategy for OVID Medline. Source: Ovid MEDLINE(R) 1946 to August Week 1 2016

| No  | Query                                            | Results |
|-----|--------------------------------------------------|---------|
| 1.  | atopic dermatitis.mp. or exp Dermatitis, Atopic/ | 20,196  |
| 2.  | atopic eczema.mp.                                | 2,321   |
| 3.  | exp Eczema/ or eczema.mp.                        | 17,600  |
| 4.  | exp Dermatitis/ or dermatitis.mp.                | 103,653 |
| 5.  | neurodermatitis.mp. or exp Neurodermatitis/      | 1,685   |
| 6.  | atopic skin diathesis.mp.                        | 16      |
| 7.  | 1 or 2 or 3 or 4 or 5 or 6                       | 106,474 |
| 8.  | exp Prevalence/                                  | 226,438 |
| 9.  | prevalence.mp.                                   | 488,147 |
| 10. | population based.mp.                             | 87,215  |
| 11. | population-based.mp.                             | 87,215  |
| 12. | general population.mp.                           | 68,866  |
| 13. | 8 or 9 or 10 or 11 or 12                         | 602,267 |
| 14. | Australia.mp. or exp Australia/                  | 134,502 |
| 15. | exp Austria/ or Austria.mp.                      | 21,420  |
| 16. | Belgium.mp. or exp Belgium/                      | 21,472  |
| 17. | Bulgaria.mp. or exp Bulgaria/                    | 6,876   |
| 18. | Canada.mp. or exp Canada/                        | 152,636 |
| 19. | chile.mp. or exp Chile/                          | 13,432  |
| 20. | croatia.mp. or exp Croatia/                      | 7,191   |
| 21. | czech republic.mp. or exp Czech Republic/        | 8,264   |
| 22. | denmark.mp. or exp Denmark/                      | 50,447  |
| 23. | estonia.mp. or exp Estonia/                      | 2,693   |
| 24. | Finland.mp. or exp Finland/                      | 36,977  |
| 25. | France.mp. or exp France/                        | 107,290 |
| 26. | greece.mp. or exp Greece/                        | 18,934  |
| 27. | exp Hungary/ or hungary.mp.                      | 19,769  |
| 28. | iceland.mp. or exp Iceland/                      | 4,874   |
| 29. | exp Ireland/ or ireland.mp.                      | 23,435  |
| 30. | israel.mp. or exp Israel/                        | 30,382  |
| 31. | italy.mp. or exp Italy/                          | 95,176  |
| 32. | japan.mp. or exp Japan/                          | 150,129 |
| 33. | latvia.mp. or exp Latvia/                        | 1,481   |
| 34. | liechtenstein.mp. or exp Liechtenstein/          | 212     |
| 35. | lithuania.mp. or exp Lithuania/                  | 2,892   |
| 36. | luxembourg.mp. or exp Luxembourg/                | 981     |
| 37. | malta.mp. or exp Malta/                          | 1,062   |
| 38. | exp Netherlands/ or netherlands.mp.              | 69,231  |

| No  | Query                                                                                                                                                                                     | Results    |
|-----|-------------------------------------------------------------------------------------------------------------------------------------------------------------------------------------------|------------|
| 39. | new zealand.mp. or exp New Zealand/                                                                                                                                                       | 55,062     |
| 40. | norway.mp. or exp Norway/                                                                                                                                                                 | 43,476     |
| 41. | exp Poland/ or poland.mp.                                                                                                                                                                 | 46,684     |
| 42. | portugal.mp. or exp Portugal/                                                                                                                                                             | 11,999     |
| 43. | cyprus.mp. or exp Cyprus/                                                                                                                                                                 | 1,422      |
| 44. | republic of cyprus.mp.                                                                                                                                                                    | 22         |
| 45. | romania.mp. or exp Romania/                                                                                                                                                               | 10,210     |
| 46. | slovakia.mp. or exp Slovakia/                                                                                                                                                             | 3,567      |
| 47. | slovenia.mp. or Slovenia/                                                                                                                                                                 | 2,945      |
| 48. | spain.mp. or exp Spain/                                                                                                                                                                   | 73,389     |
| 49. | sweden.mp. or exp Sweden/                                                                                                                                                                 | 75,511     |
| 50. | switzerland.mp. or exp Switzerland/                                                                                                                                                       | 38,778     |
| 51. | USA.mp.                                                                                                                                                                                   | 67,811     |
| 52. | exp United States/ or united states of america.mp.                                                                                                                                        | 1,216,728  |
| 53. | eastern europe.mp. or exp Europe, Eastern/                                                                                                                                                | 160,721    |
| 54. | exp Europe/                                                                                                                                                                               | 1,219,077  |
| 55. | nordic countries.mp. or exp "Scandinavian and Nordic Countries"/                                                                                                                          | 172,045    |
| 56. | scandinavia.mp.                                                                                                                                                                           | 3,395      |
| 57. | baltic.mp. or exp Baltic States/                                                                                                                                                          | 8,027      |
| 58. | exp Mediterranean Region/ or mediterranean.mp.                                                                                                                                            | 31,052     |
| 59. | yugoslavia.mp. or exp Yugoslavia/                                                                                                                                                         | 9,724      |
| 60. | czechoslovakia.mp. or exp Czechoslovakia/                                                                                                                                                 | 18,660     |
| 61. | Slovak republic.mp.                                                                                                                                                                       | 513        |
| 62. | exp Korea/ or korea.mp. or exp "Republic of Korea"/                                                                                                                                       | 37,894     |
| 63. | US.mp.                                                                                                                                                                                    | 7,792,425  |
| 64. | east* germany.mp. or exp Germany, East/                                                                                                                                                   | 13,807     |
| 65. | exp Germany, West/ or west* germany.mp.                                                                                                                                                   | 30,841     |
| 66. | west* europe.mp.                                                                                                                                                                          | 8,042      |
| 67. | south* europe.mp.                                                                                                                                                                         | 3,865      |
| 68. | north* europe.mp.                                                                                                                                                                         | 5,852      |
| 69. | germany.mp. or exp Germany/                                                                                                                                                               | 165,123    |
| 70. | great britain.mp. or exp Great Britain/                                                                                                                                                   | 330,548    |
| 71. | scotland.mp. or exp Scotland/                                                                                                                                                             | 26,656     |
| 72. | exp England/ or england.mp.                                                                                                                                                               | 114,925    |
| 73. | exp Wales/ or wales.mp.                                                                                                                                                                   | 30,283     |
| 74. | exp Northern Ireland/ or north* ireland.mp.                                                                                                                                               | 5,774      |
| 75. | united kingdom.mp.                                                                                                                                                                        | 28,670     |
| 76. | UK.mp.                                                                                                                                                                                    | 73,484     |
| 77. | east* europe.mp.                                                                                                                                                                          | 6,036      |
| 78. | 14 or 15 or 16 or 17 or 18 or 19 or 20 or 21 or 22 or 23 or 24 or 25 or 26 or 27 or 28 or 29 or 30 or 31 or 32 or 33 or 34 or 35 or 36 or 37 or 38 or 39 or 40 or 41 or 42 or 43 or 44 or | 10,040,276 |

| <b>No</b> | <b>Query</b>                                                                                                                                                                                       | <b>Results</b> |
|-----------|----------------------------------------------------------------------------------------------------------------------------------------------------------------------------------------------------|----------------|
|           | 45 or 46 or 47 or 48 or 49 or 50 or 51 or 52 or 53 or 54 or 55 or 56 or 57 or 58 or 59 or 60 or 61 or 62 or 63 or 64 or 65 or 66 or 67 or 68 or 69 or 70 or 71 or 72 or 73 or 74 or 75 or 76 or 77 |                |
| 79.       | 7 and 13 and 78                                                                                                                                                                                    | 3,730          |

**Supplementary table 2.** Assessments of risk of bias items by study.

| <b>Source</b>                       | <b>Was probability sampling used?</b> | <b>Representativeness of the sample</b> | <b>Adequacy of response rate</b> | <b>Established validity of the survey instrument</b> | <b>Were sampling features accounted for in analysis?</b> |
|-------------------------------------|---------------------------------------|-----------------------------------------|----------------------------------|------------------------------------------------------|----------------------------------------------------------|
| Choi 2012 <sup>34</sup>             | high                                  | unclear                                 | low                              | low                                                  | low                                                      |
| Cibella 2011 <sup>61</sup>          | high                                  | unclear                                 | low                              | low                                                  | unclear                                                  |
| Duhme 1998 <sup>49</sup>            | low                                   | low                                     | low                              | low                                                  | low                                                      |
| Emerson 2001 <sup>54</sup>          | high                                  | unclear                                 | low                              | low                                                  | low                                                      |
| Flohr 2011 <sup>76</sup>            | NA                                    | NA                                      | NA                               | low                                                  | NA                                                       |
| Flohr 2012 <sup>75</sup>            | NA                                    | NA                                      | NA                               | low                                                  | NA                                                       |
| Flohr 2009 <sup>74</sup>            | NA                                    | NA                                      | NA                               | low                                                  | NA                                                       |
| Garcia-Marcos 2014 <sup>77</sup>    | NA                                    | NA                                      | NA                               | low                                                  | NA                                                       |
| Anderson 2004 <sup>55</sup>         | low                                   | low                                     | low                              | unclear                                              | low                                                      |
| Grize 2006 <sup>73</sup>            | unclear                               | unclear                                 | low                              | low                                                  | unclear                                                  |
| Guiote-Domínguez 2008 <sup>71</sup> | low                                   | low                                     | unclear                          | low                                                  | low                                                      |
| Hong 2014 <sup>35</sup>             | high                                  | unclear                                 | low                              | low                                                  | unclear                                                  |
| Kudzyte 2008 <sup>66</sup>          | low                                   | low                                     | low                              | low                                                  | unclear                                                  |
| Kurosaka 2011 <sup>42</sup>         | high                                  | unclear                                 | low                              | low                                                  | unclear                                                  |
| Lee 2011 <sup>36</sup>              | low                                   | low                                     | unclear                          | low                                                  | low                                                      |
| Augustin 2015 <sup>50</sup>         | low                                   | low                                     | low                              | low                                                  | low                                                      |
| Miyake 2011 <sup>43</sup>           | low                                   | low                                     | high                             | low                                                  | low                                                      |
| Miyake 2004 <sup>44</sup>           | low                                   | low                                     | high                             | low                                                  | low                                                      |
| Mortz 2001 <sup>57</sup>            | low                                   | low                                     | low                              | low                                                  | low                                                      |
| Radtke 2014 <sup>51</sup>           | low                                   | low                                     | low                              | low                                                  | low                                                      |
| Sasaki 2016 <sup>45</sup>           | high                                  | unclear                                 | low                              | low                                                  | low                                                      |
| Saunes 2007 <sup>70</sup>           | low                                   | low                                     | low                              | low                                                  | low                                                      |
| Silverberg 2015 <sup>59</sup>       | low                                   | low                                     | unclear                          | low                                                  | low                                                      |
| Ukawa 2013 <sup>46</sup>            | high                                  | unclear                                 | unclear                          | low                                                  | low                                                      |

|                                |         |         |         |         |         |
|--------------------------------|---------|---------|---------|---------|---------|
| Kim 2014 <sup>72</sup>         | low     | low     | high    | low     | low     |
| Asher 2001 <sup>67</sup>       | low     | low     | low     | low     | low     |
| Asher 2006 <sup>78</sup>       | NA      | NA      | NA      | low     | NA      |
| Kolokotroni 2011 <sup>64</sup> | low     | low     | low     | unclear | low     |
| Austin 1999 <sup>56</sup>      | low     | low     | low     | low     | low     |
| Lee 2012 <sup>37</sup>         | low     | low     | unclear | unclear | unclear |
| Lee 2016 <sup>38</sup>         | low     | low     | unclear | unclear | unclear |
| Banac 2013 <sup>63</sup>       | low     | low     | unclear | unclear | low     |
| Oh 2004 <sup>41</sup>          | low     | low     | unclear | unclear | unclear |
| Remes 1998 <sup>65</sup>       | low     | low     | low     | low     | low     |
| Silverberg 2015 <sup>60</sup>  | low     | low     | low     | low     | low     |
| Sugiyama 2000 <sup>47</sup>    | unclear | unclear | unclear | low     | unclear |
| Sybilski 2015 <sup>68</sup>    | low     | low     | high    | low     | unclear |
| van de Ven 2006 <sup>69</sup>  | low     | low     | low     | unclear | unclear |
| Wang 2010 <sup>62</sup>        | low     | low     | high    | low     | unclear |
| Yura 2011 <sup>48</sup>        | low     | low     | low     | low     | low     |
| Zutavern 2005 <sup>52</sup>    | low     | low     | low     | unclear | unclear |
| Worm 2006 <sup>53</sup>        | low     | unclear | high    | low     | low     |
| Vinding 2014 <sup>58</sup>     | low     | low     | high    | low     | low     |
| Park 2011 <sup>39</sup>        | low     | low     | high    | low     | low     |
| Yu 2012 <sup>40</sup>          | low     | unclear | low     | low     | low     |

Abbreviations: NA – not applicable

**Supplementary table 3.** Sensitivity analysis of age-group definitions used in the AD prevalence.

| Age group                                                                                 | No of studies | AD prevalence % [95% CI] |
|-------------------------------------------------------------------------------------------|---------------|--------------------------|
| <i>Data from studies with inconsistent age groups as a separate category</i>              |               |                          |
| Between age groups 6-18                                                                   | 25            | 7.58 [6.01; 9.52]        |
| 6-12                                                                                      | 81            | 9.41 [8.21; 10.76]       |
| 13-18                                                                                     | 41            | 8.29 [6.57; 10.40]       |
| <i>Data from studies with inconsistent age groups merged to the age group 6-12 years</i>  |               |                          |
| 6-12                                                                                      | 106           | 8.94 [7.94; 10.005]      |
| 13-18                                                                                     | 41            | 8.29 [6.57; 10.40]       |
| <i>Data from studies with inconsistent age groups merged to the age group 13-18 years</i> |               |                          |
| 6-12                                                                                      | 81            | 9.41 [8.21; 10.76]       |
| 13-18                                                                                     | 66            | 8.03 [6.80; 9.46]        |

**Supplementary figure 1.** Funnel plots for 12-month prevalence of AD across age groups.

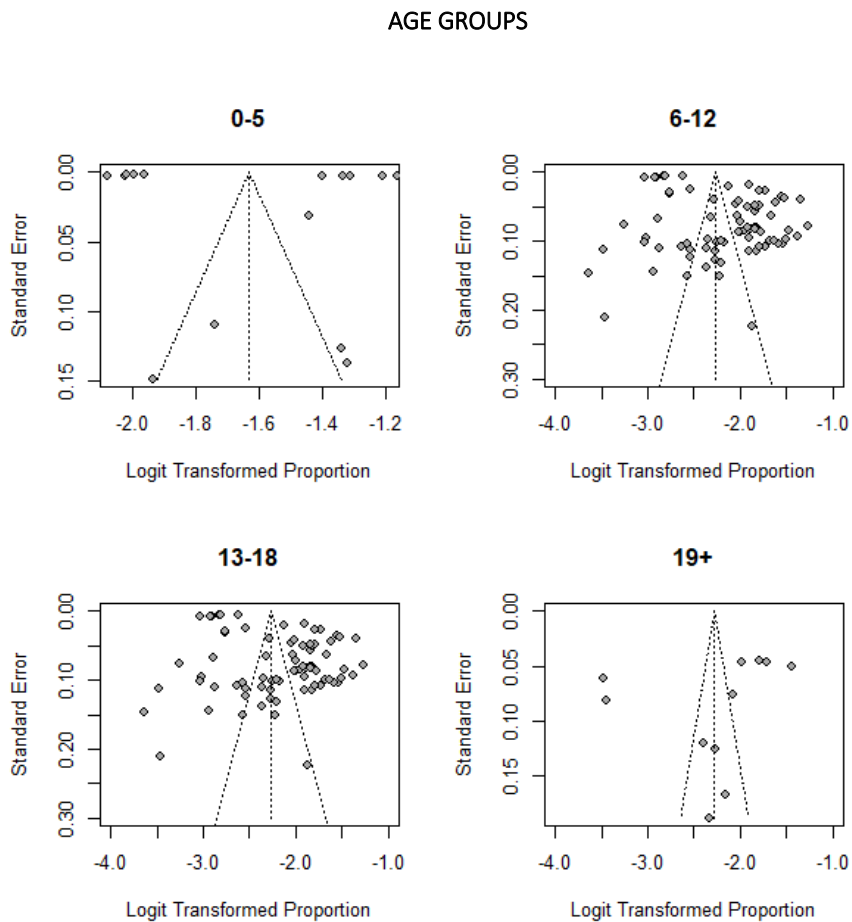

Supplement: 41598_2022_19508_MOESM2_ESM.pdf [file 41598_2022_19508_MOESM2_ESM.pdf]
