# Supplementary material for: 12-month prevalence of atopic dermatitis in resource-rich countries: a systematic review and meta-analysis
Source: PubMed Central journal article supplement (PMC9448775; doi:10.1038/s41598-022-19508-7), 2022-09-06

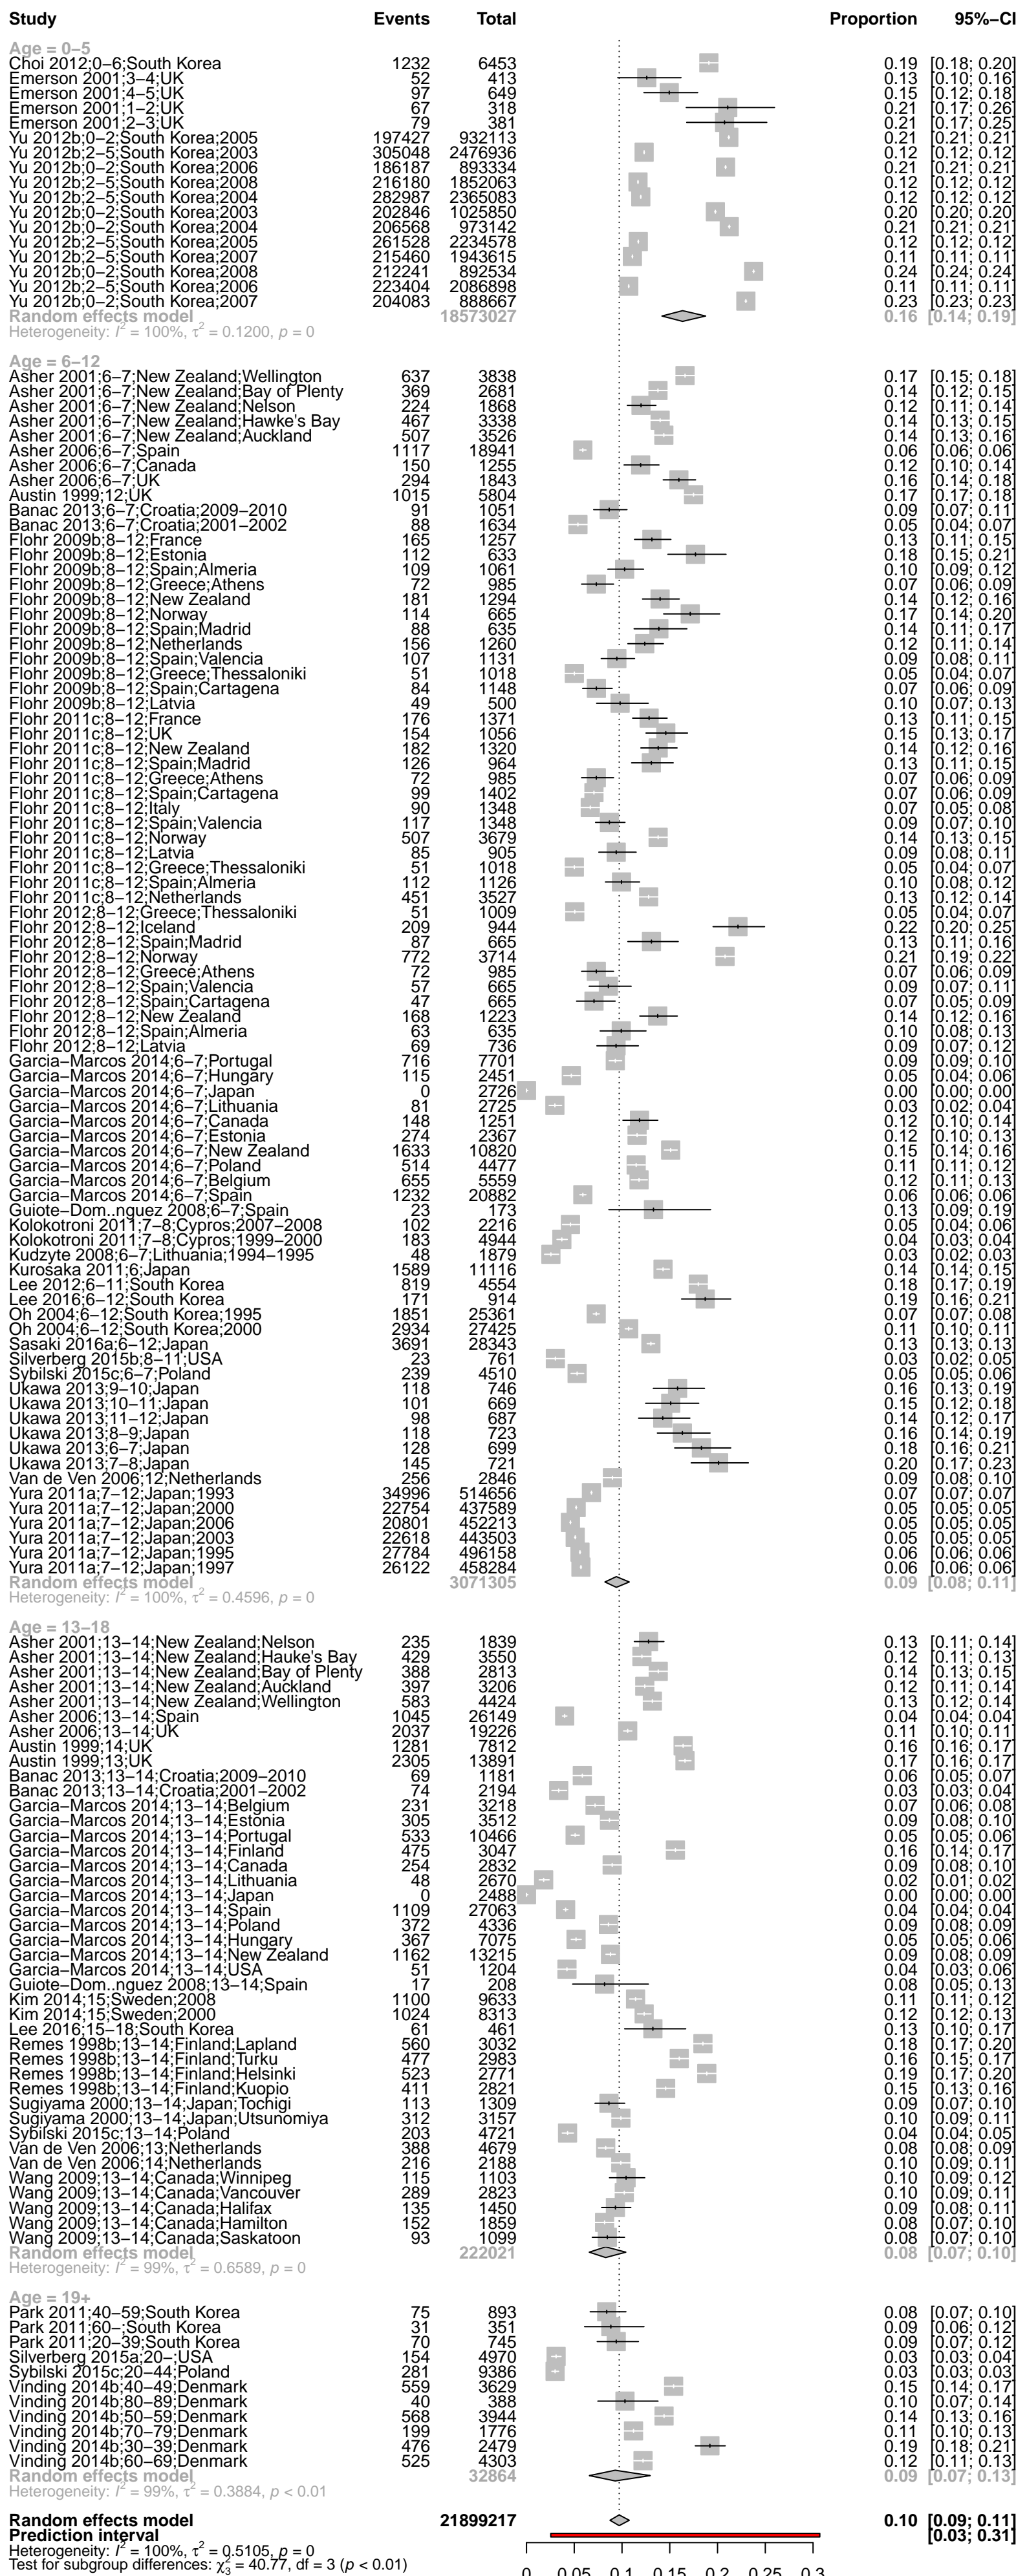

Supplement: 41598_2022_19508_MOESM1_ESM.pdf [file 41598_2022_19508_MOESM1_ESM.pdf]
